# Supplementary material for: Auto-qPCR; a python-based web app for automated and reproducible analysis of qPCR data
Source: PubMed Central journal article supplement (PMC8556264; doi:10.1038/s41598-021-99727-6), 2021-10-29
Supplement: 41598_2021_99727_MOESM1_ESM.pdf [file 41598_2021_99727_MOESM1_ESM.pdf]

## Supplementary Figure Legends

**Supplementary Figure S1. Screen shot of Auto-qPCR interface.**

**Supplementary Figure S2. Examples of results spreadsheet files to use as input for Auto-qPCR. (A)** Spreadsheet with column names needed. **(B)** Screen shot of the top of the csv saved from the results sheet of the exported Excel file. **(C)** Screen shot of the column names in the save results file that will be read into Auto-qPCR.

**Supplementary Figure S3. Example output from Auto-qPCR using the genomic instability model. (A)** The Log.txt output from the file generated by Auto-qPCR. The file lists the steps completed by the program and the inputs from the web interface. This example is from the genomic instability analysis. The selection for statistical analysis is also shown in the text file. Using the log file, the exact analysis can be repeated because all the settings are recorded. **(B)** Bar chart showing an alternative visualization for the genomic instability assay where the data is grouped by cell lines on the x-axis and colours indicated in the legend represent the regions of chromosomes tested.

**Supplementary Figure S4. Screen shots of options entered into Auto-qPCR web app to analyze the example data for the absolute model in Fig. 3. (A)** Options to produce the summary data. **(B)** Statistics options.

**Supplementary Figure S5. Example images of AJG001-C4 at four stages of development (iPSCs, NPCs, as well as 4 and 6 week DANs). (A)** iPSCs stained for pluripotency markers (Nanog, Tra1-60, SSEA4, OCT3-4 as indicated), together with Hoechst and shown as merged images on the right. **(B)** Neural precursor cells (NPCs) expressing dopaminergic lineage (SOX1 and OTX2), proliferation (Ki67) and neural progenitors (Nestin) markers. **(C)** Dopaminergic neurons after 4 and 6 weeks of differentiation stained with neuronal marker Tuj1 in all images and dopaminergic markers FOXA2, GIRK2 and TH as indicated.

**Supplementary Figure S6. Screen shots of options entered into Auto-qPCR web app to analyze the example data for the relative models in Fig. 4. (A)** Options to produce the summary data using the relative  $\Delta\text{CT}$  method, where values are normalized to the endogenous controls (ACTB and GAPDH). **(B)** Options to produce the

summary data using the relative  $\Delta\Delta\text{CT}$  method, where expression values are normalized both the endogenous controls and the reference sample.

**Supplementary Figure S7. Screen shot of options entered into Auto-qPCR web app to for statistical analysis in Fig. 4 using relative models.** Statistics options used, the selections are the same for both the  $\Delta\text{CT}$  and the  $\Delta\Delta\text{CT}$  normalization methods.

**Supplementary Figure S8. Screen shot of options entered into Auto-qPCR web app to for analysis of the input used for the absolute quantification to reprocess data from the Opticon 2 Biorad thermocycler. (A)** Screen shot of file names that contain the endogenous control and the gene to be analyzed. **(B)** Screen shot of Auto-qPCR with the file names and entered under file information. All the options entered are to create the summary data used in Fig. 5.

**Supplementary Figure S9. Screen shot of options entered for statistical analysis into Auto-qPCR web app for the absolute quantification to reprocess data from the Opticon 2 Biorad thermocycler. (A)** Statistics options to compare brain regions and treatment combined to create 6 groups, a one-way ANOVA will be performed. **(B)** Statistic options to compare treatment and control (the brain regions are treated as one group), a t-test will be performed.

**Supplementary Figure S10. Screen shot of options entered for statistical analysis into Auto-qPCR web app for the absolute quantification to reprocess data from the Opticon 2 Biorad thermocycler. (A)** Statistics options to compare brain regions with control vs. cocaine treated as one group, a one-way ANOVA will be performed with three brain regions as groups. **(B)** Statistic options for the two-way ANOVA where interaction between treatment and control is tested, the two variables are treatment and region.

All inputs are case insensitive. Separate with commas when multiple inputs are required and do not leave spaces.

\* fields are required

Select model \*

Absolute  Relative ( $\Delta$ CT)  Relative ( $\Delta\Delta$ CT)  Instability

Upload your data (results.csv or results.txt): \*

Choose file

Browse

File information

Would you like to fill in file information?

Yes

No

Normalization options

Endogenous control  
gene(s)/chromosome(s): \*

Endogenous control

Reference sample:

Control sample

Options for removing technical replicates

SD cut-Off:

0.3

Max proportion:

0.5

Preserve highly variable replicates:

Yes

No

Visualization options

Target order:

Target order

Sample order:

Sample order

Statistics

Would you like to do statistical analysis?

Yes

No

Plots will be automatically generated.

localhost is not in the list of  
supported domains for this  
site key.

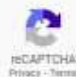

Submit

Clear

A

| Column Name     | Well                      | Well Position | Sample Name      | Target Name          | Task                               | CT           | Quantity     | Reporter              | Quencher |
|-----------------|---------------------------|---------------|------------------|----------------------|------------------------------------|--------------|--------------|-----------------------|----------|
| Example         |                           | 1A1           | Normal           | CHR1                 | UNKNOWN                            | 24.702       |              | FAM                   | NEQ-MGB  |
| Column required | Yes                       | No            | Yes              | Yes                  | Yes                                | Yes          | Yes          | Yes                   | No       |
| Values required | No                        | No            | Yes              | Yes                  | Yes                                | Yes          | No           | No                    | No       |
| Purpose         | Identify start of columns |               | Identify samples | Identify gene/target | select rows of data to be included | Input values | For absolute | Can use for filtering |          |

B

INSTABILITY\_example.csv - LibreOffice Calc

File Edit View Insert Format Styles Sheet Data Tools Window Help

Libération Sans: 10

A18 Calibration Pure Dye SYBR is expired

|    | A                                                       | B              |
|----|---------------------------------------------------------|----------------|
| 1  | Block Type                                              | 384-Well Block |
| 2  | Calibration Background is expired                       | No             |
| 3  | Calibration Background performed on                     | 2018-12-11     |
| 4  | Calibration Pure Dye <u>ABY</u> is expired              | No             |
| 5  | Calibration Pure Dye <u>ABY</u> performed on            | 2018-12-11     |
| 6  | Calibration Pure Dye <u>CY5</u> is expired              | No             |
| 7  | Calibration Pure Dye <u>CY5</u> performed on            | 2018-12-11     |
| 8  | Calibration Pure Dye <u>FAM</u> is expired              | No             |
| 9  | Calibration Pure Dye <u>FAM</u> performed on            | 2018-12-11     |
| 10 | Calibration Pure Dye <u>JUN</u> is expired              | No             |
| 11 | Calibration Pure Dye <u>JUN</u> performed on            | 2018-12-11     |
| 12 | Calibration Pure Dye <u>MUSTANG PURPLE</u> is expired   | No             |
| 13 | Calibration Pure Dye <u>MUSTANG PURPLE</u> performed on | 2018-12-11     |
| 14 | Calibration Pure Dye <u>NED</u> is expired              | No             |
| 15 | Calibration Pure Dye <u>NED</u> performed on            | 2018-12-11     |
| 16 | Calibration Pure Dye <u>ROX</u> is expired              | No             |

C

|    |             |               |        |             |             |         |          |          |               |               |             |           |
|----|-------------|---------------|--------|-------------|-------------|---------|----------|----------|---------------|---------------|-------------|-----------|
| 46 |             |               |        |             |             |         |          |          |               |               |             |           |
| 47 | Well        | Well Position | Omit   | Sample Name | Target Name | Task    | Reporter | Quencher | Quantity      | Quantity Mean | Qu          |           |
| 48 |             | 1 A1          | FALSE  | Normal      | CHR1        | UNKNOWN | FAM      | NEQ-MGB  |               |               |             |           |
| 49 |             | 2 A2          | FALSE  | Normal      | CHR1        | UNKNOWN | FAM      | NEQ-MGB  |               |               |             |           |
| 50 |             | 3 A3          | FALSE  | Normal      | CHR1        | UNKNOWN | FAM      | NEQ-MGB  |               |               |             |           |
| 51 |             | 7 A7          | FALSE  | GM25953     | CHR1        | UNKNOWN | FAM      | NEQ-MGB  |               |               |             |           |
| 52 |             | 8 A8          | FALSE  | GM25953     | CHR1        | UNKNOWN | FAM      | NEQ-MGB  |               |               |             |           |
| 53 |             | 9 A9          | FALSE  | GM25953     | CHR1        | UNKNOWN | FAM      | NEQ-MGB  |               |               |             |           |
| 54 |             | 10 A10        | FALSE  | GM25975     | CHR1        | UNKNOWN | FAM      | NEQ-MGB  |               |               |             |           |
| 55 |             | 11 A11        | FALSE  | GM25975     | CHR1        | UNKNOWN | FAM      | NEQ-MGB  |               |               |             |           |
| 56 |             | 12 A12        | FALSE  | GM25975     | CHR1        | UNKNOWN | FAM      | NEQ-MGB  |               |               |             |           |
| 57 |             | 13 A13        | FALSE  | GM25974     | CHR1        | UNKNOWN | FAM      | NEQ-MGB  |               |               |             |           |
| 58 |             | 14 A14        | FALSE  | GM25974     | CHR1        | UNKNOWN | FAM      | NEQ-MGB  |               |               |             |           |
| 59 |             | 15 A15        | FALSE  | GM25974     | CHR1        | UNKNOWN | FAM      | NEQ-MGB  |               |               |             |           |
| 46 |             |               |        |             |             |         |          |          |               |               |             |           |
| 47 | Quantity SD | RQ            | RQ Min | RQ Max      | CT          | Ct Mean | Ct SD    | Delta Ct | Delta Ct Mean | Delta Ct SD   | Delta Ct SE | Delta Del |
| 48 |             |               |        |             |             | 24.702  | 24.755   | 0.046    |               |               |             |           |
| 49 |             |               |        |             |             | 24.777  | 24.755   | 0.046    |               |               |             |           |
| 50 |             |               |        |             |             | 24.786  | 24.755   | 0.046    |               |               |             |           |
| 51 |             |               |        |             |             | 27.286  | 27.322   | 0.042    |               |               |             |           |
| 52 |             |               |        |             |             | 27.313  | 27.322   | 0.042    |               |               |             |           |
| 53 |             |               |        |             |             | 27.368  | 27.322   | 0.042    |               |               |             |           |
| 54 |             |               |        |             |             | 26.779  | 26.815   | 0.052    |               |               |             |           |
| 55 |             |               |        |             |             | 26.875  | 26.815   | 0.052    |               |               |             |           |
| 56 |             |               |        |             |             | 26.793  | 26.815   | 0.052    |               |               |             |           |
| 57 |             |               |        |             |             | 26.75   | 26.753   | 0.015    |               |               |             |           |
| 58 |             |               |        |             |             | 26.77   | 26.753   | 0.015    |               |               |             |           |
| 59 |             |               |        |             |             | 26.741  | 26.753   | 0.015    |               |               |             |           |

Maussion, Thomas et al. Supplementary Figure S2

# A

Started  
Model: instability

Files upload complete.  
Gene names if they are included in file names:  
Quencher:  
Task: UNKNOWN  
Endogenous control genes: CHR4  
Cut-off: 0.3  
Maximum Outliers: 0.5  
Preserve highly variable replicates: False  
Target Order:  
CHR1, CHR4, CHR8, CHR10, CHR12, CHR17, CHR18, CHR20, CHRX  
Sample Order: GM25953, GM25975, GM25974, GM25952, Normal  
Control Sample: Normal  
Additional column names:  
Number of groups: None  
Group column name:  
Group name:  
Column name A:  
Column Name B:  
Group names for column A:  
Group names for column B:  
Repeated measures: False  
Normal distribution: True  
Clean data and summary data are created  
Plots of the summary data are created.

# B

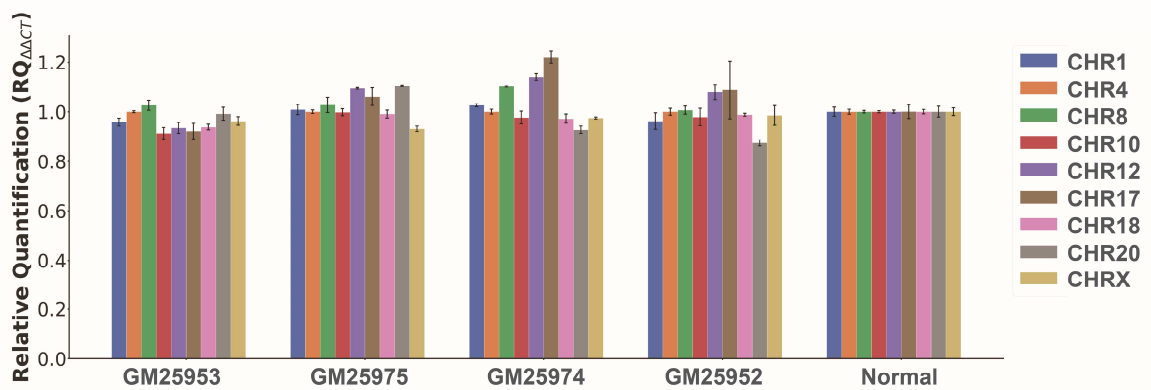

**Maussion, Thomas et al. Supplementary Figure S3**

## A ?

Select model \*

Absolute  Relative ( $\Delta$ CT)  Relative ( $\Delta\Delta$ CT)  Instability

Upload your data (results.csv or results.txt): \* ?

5 file(s) uploaded

Browse

File information ?

Would you like to fill in file information?  Yes  No

Normalization options ?

Endogenous control gene(s)/chromosome(s): \*

ACTB,GAPDH

Reference sample:

Control sample

Options for removing technical replicates ?

SD cut-Off:  Max proportion:  Preserve highly variable replicates:  Yes  No

Visualization options ?

Target order:

W001-2,AiW002-2,AJC001-5,AJG001C4

Sample order:

KCNJ6,SYP,GRIA1

## B ?

Statistics

Would you like to do statistical analysis?  Yes  No

Enter the column names you would like to include for statistical analysis:

Column names

How many groups do you have (number of conditions to compare)

4

Identify your groups (variables) ?

Where are your groups?  Group columns  Within sample names

How many variables do you want to compare?  One  Two ?

Enter your groups:

IPSC,NPC,DA4W,DA6W

Select Parameters ?

Type of tests  Parametric  Non-parametric

Type of measurements  Repeated/dependent  Independent ?

Plots will be automatically generated.

Localhost is not in the list of supported domains for this site key.

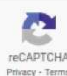

Submit

Clear

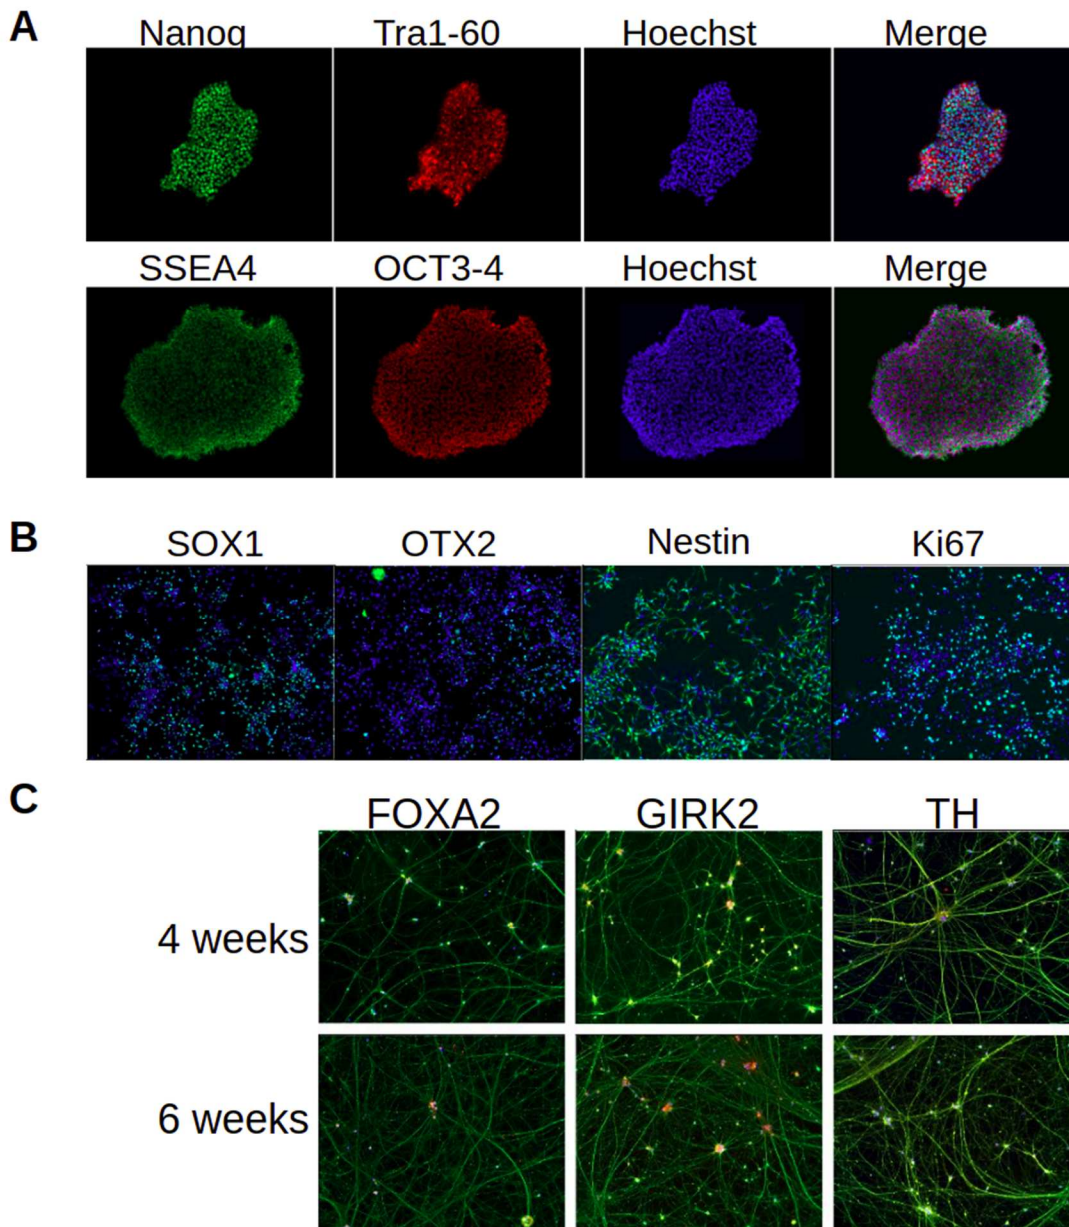

Maussion, Thomas et al. Supplementary Figure S5

**A****Select model \***
 Absolute
  Relative ( $\Delta CT$ )
  Relative ( $\Delta\Delta CT$ )
  Instability
**Upload your data (results.csv or results.txt): \***

1 file(s) uploaded

Browse

**File information**

Would you like to fill in file information?

 Yes No**Normalization options**

Endogenous control gene(s)/chromosome(s): \*

ACTB,GAPDH

Reference sample:

Control sample

**Options for removing technical replicates**

SD cut-Off:

0.3

Max proportion:

0.5

Preserve highly variable replicates:

 Yes No**Visualization options**

Target order:

Q-2-D0,AiW002-2-D7,KYOU-D0,KYOU-D7

Sample order:

PAX6,CAMK2A,GRIN1

**B****Select model \***
 Absolute
  Relative ( $\Delta CT$ )
  Relative ( $\Delta\Delta CT$ )
  Instability
**Upload your data (results.csv or results.txt): \***

1 file(s) uploaded

Browse

**File information**

Would you like to fill in file information?

 Yes No**Normalization options**

Endogenous control gene(s)/chromosome(s): \*

ACTB,GAPDH

Reference sample: \*

AiW002-2-D0

**Options for removing technical replicates**

SD cut-Off:

0.3

Max proportion:

0.5

Preserve highly variable replicates:

 Yes No**Visualization options**

Target order:

Q-2-D0,AiW002-2-D7,KYOU-D0,KYOU-D7

Sample order:

PAX6,CAMK2A,GRIN1

**Maussion, Thomas et al. Supplementary Figure S6**



### Statistics

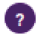

Would you like to do statistical analysis?

Yes

No

Enter the column names you would like to include for statistical analysis:

Column names

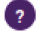

How many groups do you have (number of conditions to compare)

2

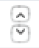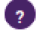

### Identify your groups (variables)

Where are your groups?

Group columns

Within sample names

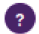

How many variables do you want to compare?

One

Two

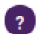

Enter your groups:

D0,D7

### Select Parameters

Type of tests

Parametric

Non-parametric

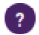

Type of measurements

Repeated/dependent

Independent

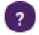

## Maussion, Thomas et al. Supplementary Figure S7

A

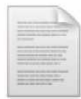

B2M\_n.csv

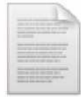

NRXN3\_n.csv

B

Select model \*

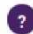

Absolute

Relative ( $\Delta$ CT)

Relative ( $\Delta\Delta$ CT)

Instability

Upload your data (results.csv or results.txt): \*

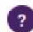

2 file(s) uploaded

Browse

File information

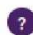

Would you like to fill in file information?

Yes

No

If your file does not contain gene or target names, enter target names included in your file name:

NRXN3,B2M

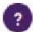

Name of your quencher:

TMR

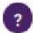

Name within the column 'Task' or 'Content' that identifies the unknown samples:

sample

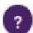

Normalization options

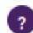

Endogenous control gene(s)/chromosome(s): \*

B2M

Reference sample:

Control sample

Options for removing technical replicates

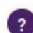

SD cut-Off:

0.3

Max proportion:

0.5

Preserve highly variable replicates:

Yes

No

Visualization options

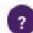

Target order:

R5bis SN,R6bisSN,R8bisSN,V2SN,V8SN

Sample order:

Sample order

**Maussion, Thomas et al. Supplementary Figure S8**

**A****Statistics**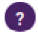

Would you like to do statistical analysis?

 Yes No

Enter the column names you would like to include for statistical analysis:

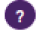

How many groups do you have (number of conditions to compare)

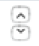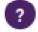**Identify your groups (variables)**

Where are your groups?

 Group columns Within sample names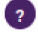

How many variables do you want to compare?

 One Two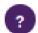

Enter the your group column name:

**Select Parameters**

Type of tests

 Parametric Non-parametric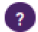

Type of measurements

 Repeated/dependent Independent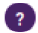**Statistics**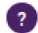

Would you like to do statistical analysis?

 Yes No

Enter the column names you would like to include for statistical analysis:

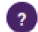

How many groups do you have (number of conditions to compare)

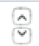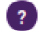**Identify your groups (variables)**

Where are your groups?

 Group columns Within sample names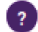

How many variables do you want to compare?

 One Two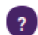

Enter the your group column name:

**Select Parameters**

Type of tests

 Parametric Non-parametric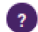

Type of measurements

 Repeated/dependent Independent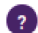

**A****Statistics**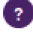

Would you like to do statistical analysis?

 Yes No

Enter the column names you would like to include for statistical analysis:

Region

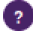

How many groups do you have (number of conditions to compare)

Quantity

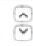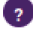**Identify your groups (variables)**

Where are your groups?

 Group columns Within sample names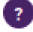

How many variables do you want to compare?

 One Two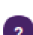

Enter the your group column name:

Region

**Select Parameters**

Type of tests

 Parametric Non-parametric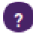

Type of measurements

 Repeated/dependent Independent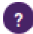**B****Statistics**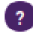

Would you like to do statistical analysis?

 Yes No

Enter the column names you would like to include for statistical analysis:

Treatment,Region

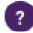

How many groups do you have (number of conditions to compare)

6

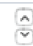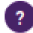**Identify your groups (variables)**

Where are your groups?

 Group columns Within sample names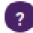

How many variables do you want to compare?

 One Two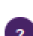

Enter the names of your group column for variable A:

Treatment

Enter the names of your group column for variable B:

Region

**Select Parameters**

Type of tests

 Parametric Non-parametric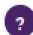

Type of measurements

 Repeated/dependent Independent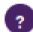

## Supplemental Tables

**Table S1: Overview of cell lines: Human-derived induced pluripotent stem cells used.**

| Cell line     | Donor Age | Sex | Cell Type   | Reprogramming Method |
|---------------|-----------|-----|-------------|----------------------|
| GM25952       | 10        | F   | Fibroblast  | Episomal             |
| GM25953       | 43        | F   | Fibroblast  | Episomal             |
| GM25974       | 7         | F   | Fibroblast  | Episomal             |
| GM25975       | 37        | F   | Fibroblast  | Episomal             |
| 522-2666-2    | NA        | NA  | Lymphocytes | Retrovirus           |
| AIW001-2      | 48        | F   | PBMCs       | Retrovirus           |
| AIW002-2      | 37        | M   | PBMCs       | Retrovirus           |
| NCRM1         | NA        | M   | Cord Blood  | Episomal             |
| AJG001-C4     | 37        | M   | PBMCs       | Episomal             |
| AJC001-5      | 37        | M   | Fibroblast  | Retrovirus           |
| KYOU-DRX0190B | 36        | F   | Fibroblast  | Retrovirus           |

**Table S2: Taqman primers/probe sets.** The primer/probe sets listed were used to generate the data presented in Figures 3 and 4 and test the absolute and relative quantification models to assess gene expression levels by Auto-qPCR web app. The primer/probe sets were selected from the assays available on the Thermo Fisher Scientific web site and chosen to cover the most important number of alternative transcripts for a given gene. With the exception of the assay for GAPDH, the amplicons overlap two exons, avoiding amplification of genomic DNA that could remain from incomplete DNase digestion. The refseq sequence used for designing the primer/probe set assay is shown.

| <b>Gene Symbol</b> | <b>Gene Name</b>                                     | <b>Location</b> | <b>Assay Reference</b> | <b>Exon Boundaries</b> | <b>Reference Accession</b> |
|--------------------|------------------------------------------------------|-----------------|------------------------|------------------------|----------------------------|
| <i>ACTB</i>        | Actin beta                                           | 7p22.1          | Hs01060665_g1          | 2-3                    | NM_001101                  |
| <i>GAPDH</i>       | Glyceraldehyde-3-phosphate dehydrogenase             | 12p13.31        | Hs02786624_g1          | 7                      | NM_001256799               |
| <i>KCNJ6</i>       | Potassium voltage-gated channel subfamily J member 6 | 21q22.13        | Hs01040524_m1          | 3-4                    | NM_002240                  |
| <i>SYP</i>         | Synaptophysin                                        | Xp11.23         | Hs00300531_m1          | 3-4                    | NM_003179                  |
| <i>CAMK2A</i>      | Calcium/calmodulin-dependent protein kinase II       | 5q32            | Hs00947041_m1          | 17-18                  | NM_015981                  |
| <i>PAX6</i>        | Paired box 6                                         | 11p13           | Hs01088114_m1          | 7-8                    | NM_000280                  |
| <i>GRIN1</i>       | Glutamate ionotropic receptor NMDA type subunit 1    | 9q34.3          | Hs00609557_m1          | 1-2                    | NM_000832                  |

**Table S3: Contents and file structure of Python scripts.** The file structure will be maintained if the Auto-qPCR program is downloaded from GitHub and run locally. These files will be found inside the ‘website’ folder if the GitHub repo is pulled or the zip file is downloaded. Folder Name indicates the parent folder and the subfolder containing the program files. File name indicates the file name for each Python script and Function indicates what processes are performed by each script.

| Folder Name          | File name                | Function                                                                                    |
|----------------------|--------------------------|---------------------------------------------------------------------------------------------|
| Auto-qPCR            | <u>main.py</u>           | calls app                                                                                   |
| application          | <u>AUTOqPCR.py</u>       | inputs data                                                                                 |
|                      |                          | inputs conditions                                                                           |
|                      |                          | removes outliers                                                                            |
|                      |                          | calls model                                                                                 |
|                      | <u>absolute.py</u>       | runs normalization for absolute model                                                       |
|                      | <u>relative.py</u>       | runs relative quantification with delta-CT normalization                                    |
|                      | <u>stability.py</u>      | runs relative quantification with delta-delta-CT normalization and genomic instability test |
|                      | <u>plot.py</u>           | creates all graphs                                                                          |
|                      | <u>statistics.py</u>     | runs all statistics                                                                         |
|                      | <u>regex_rename.py</u>   | function to allow flexible naming                                                           |
| application/template | all html interface files | creates the web form                                                                        |

**Table S4: List of all the user inputs for the Auto-qPCR program and purpose of the expected user inputs.**

Section indicates the spot in the web app where the input box is located. User Input indicates the input box or options as they appear in the web app. Selections and Values indicates possible options for the user to select and the purpose of the input.

| Section heading                           | Input item                          | Description                                                                                                                                                |
|-------------------------------------------|-------------------------------------|------------------------------------------------------------------------------------------------------------------------------------------------------------|
| Select model                              | Click model                         | Choose the analysis model to run                                                                                                                           |
| Upload your data                          | Browse                              | Select your file(s), csv, txt, xml                                                                                                                         |
| File information                          | Yes or no                           | Choose yes if your file doesn't contain gene names or you want to filter out data from a second probe.                                                     |
| Normalization options                     | Endogenous control                  | Genes/targets for normalization                                                                                                                            |
|                                           | Reference Sample                    | Control sample for $\Delta\Delta\text{CT}$ or instability tests                                                                                            |
| Options for removing technical replicates | CT-SD cut-off                       | The threshold for which the standard deviation is above and outliers from technical replicates will be removed. Default = 0.3                              |
|                                           | Max proportion                      | The proportion of replicates that can be removed. Default = 0.5. With 0.5, if there are 3 replicates, only 1 can be removed                                |
|                                           | Preserve highly variable replicates | If set to yes, a second condition is added before a replicate is removed. The difference between the mean and median must be greater than 10 % of the mean |
| Visualization Options                     | Target order                        | Genes are entered in the order they will appear on the graph                                                                                               |
|                                           | Sample order                        | Sample names are entered in the order they will appear on the graph                                                                                        |
| Statists                                  | Yes or no                           | More selections appear when yes is selected                                                                                                                |



**Table S5: Description of the statistical tests using each possible selection criteria.** The number of groups to compare, '#G' indicates the number of conditions to compare with the variables. The number of variables, '#Var' indicates the number of experimental conditions to compare. The distribution of the data determines if a parametric test will be used, for normally distributed data, or a non-parametric test will be used by the software. 'Measure' indicates if the data was collected on independent samples or on the same samples at different time points. 'Test' indicates the name of the test used by the software based on the user's sections from the other four criteria. Auto-qPCR always uses the same post-hoc test except when only two groups are being compared and no post-hoc test is performed.

| # G | # V | Distribution        | Measure                       | Test                                 | Posthoc                                                                      |
|-----|-----|---------------------|-------------------------------|--------------------------------------|------------------------------------------------------------------------------|
| 2   | 1   | parametric (normal) | Independent                   | student t-test two tailed, un-paired | none                                                                         |
| 2   | 1   | parametric (normal) | Repeated measures (dependent) | student t-test two tailed, paired    | none                                                                         |
| 2   | 1   | non-parametric      | Independent                   | Wilcoxon test                        | none                                                                         |
| 2   | 1   | non-parametric      | Repeated measures (dependent) | Mann-Whitney U test                  | none                                                                         |
| > 2 | 1   | parametric (normal) | Independent                   | one-way ANOVA                        | pairwise t-tests with FDR correction                                         |
| > 2 | 1   | parametric (normal) | Repeated measures (dependent) | one-way ANOVA                        | pairwise t-tests with FDR correction                                         |
| > 2 | 1   | non-parametric      | Independent                   | Kruskal-Wallis test                  | pairwise t-tests with FDR correction                                         |
| > 2 | 1   | non-parametric      | Repeated measures (dependent) | Friedman test                        | pairwise t-tests with FDR correction                                         |
| > 2 | 2   | parametric (normal) | Independent                   | two-way ANOVA                        | pairwise t-tests with FDR correction                                         |
| > 2 | 2   | parametric (normal) | Repeated measures (dependent) | two-way ANOVA                        | pairwise t-tests with FDR correction, for conditions 1,2 and the interaction |

**Table S6: Results of Auto-qPCR summary output found in summary\_data.csv.** The DNA region is indicated in Target Name, cell lines are indicated in Sample Name, Indel indicates if there is a duplication or deletion event calculated by the web app, Rep is the number of technical replicates included for analysis, RQ is the relative quantification, Std is the standard deviation and SEM is the standard error of the mean. RQ values from the technical replicates.

| Target Name | Sample Name | Indel  | Rep | RQ    | Std   | SEM   |
|-------------|-------------|--------|-----|-------|-------|-------|
| CHR1        | GM25953     | Normal | 3   | 0.958 | 0.028 | 0.016 |
| CHR1        | GM25975     | Normal | 3   | 1.009 | 0.036 | 0.021 |
| CHR1        | GM25974     | Normal | 3   | 1.026 | 0.011 | 0.006 |
| CHR1        | GM25952     | Normal | 3   | 0.962 | 0.058 | 0.033 |
| CHR1        | Normal      | Normal | 3   | 1.000 | 0.032 | 0.019 |
| CHR4        | GM25953     | Normal | 3   | 1.000 | 0.006 | 0.003 |
| CHR4        | GM25975     | Normal | 3   | 1.000 | 0.012 | 0.007 |
| CHR4        | GM25974     | Normal | 3   | 1.000 | 0.016 | 0.009 |
| CHR4        | GM25952     | Normal | 3   | 1.000 | 0.024 | 0.014 |
| CHR4        | Normal      | Normal | 3   | 1.000 | 0.017 | 0.010 |
| CHR8        | GM25953     | Normal | 3   | 1.026 | 0.035 | 0.020 |
| CHR8        | GM25975     | Normal | 3   | 1.027 | 0.053 | 0.031 |
| CHR8        | GM25974     | Normal | 3   | 1.102 | 0.006 | 0.003 |
| CHR8        | GM25952     | Normal | 3   | 1.007 | 0.028 | 0.016 |
| CHR8        | Normal      | Normal | 3   | 1.000 | 0.009 | 0.005 |
| CHR10       | GM25953     | Normal | 3   | 0.913 | 0.040 | 0.023 |
| CHR10       | GM25975     | Normal | 3   | 0.998 | 0.024 | 0.014 |
| CHR10       | GM25974     | Normal | 3   | 0.976 | 0.044 | 0.026 |
| CHR10       | GM25952     | Normal | 3   | 0.979 | 0.061 | 0.035 |
| CHR10       | Normal      | Normal | 3   | 1.000 | 0.008 | 0.005 |
| CHR12       | GM25953     | Normal | 3   | 0.935 | 0.038 | 0.022 |
| CHR12       | GM25975     | Normal | 3   | 1.094 | 0.005 | 0.003 |
| CHR12       | GM25974     | Normal | 3   | 1.140 | 0.023 | 0.013 |
| CHR12       | GM25952     | Normal | 3   | 1.080 | 0.053 | 0.031 |
| CHR12       | Normal      | Normal | 3   | 1.000 | 0.012 | 0.007 |
| CHR17       | GM25953     | Normal | 3   | 0.921 | 0.054 | 0.031 |
| CHR17       | GM25975     | Normal | 3   | 1.061 | 0.061 | 0.035 |
| CHR17       | GM25974     | Normal | 3   | 1.220 | 0.041 | 0.024 |
| CHR17       | GM25952     | Normal | 3   | 1.088 | 0.202 | 0.116 |
| CHR17       | Normal      | Normal | 3   | 1.001 | 0.049 | 0.028 |
| CHR18       | GM25953     | Normal | 3   | 0.938 | 0.021 | 0.012 |
| CHR18       | GM25975     | Normal | 3   | 0.991 | 0.028 | 0.016 |
| CHR18       | GM25974     | Normal | 3   | 0.972 | 0.032 | 0.019 |
| CHR18       | GM25952     | Normal | 3   | 0.988 | 0.010 | 0.006 |
| CHR18       | Normal      | Normal | 3   | 1.000 | 0.015 | 0.009 |
| CHR20       | GM25953     | Normal | 3   | 0.992 | 0.045 | 0.026 |
| CHR20       | GM25975     | Normal | 3   | 1.104 | 0.007 | 0.004 |
| CHR20       | GM25974     | Normal | 3   | 0.927 | 0.025 | 0.014 |
| CHR20       | GM25952     | Normal | 3   | 0.874 | 0.021 | 0.012 |
| CHR20       | Normal      | Normal | 3   | 1.000 | 0.037 | 0.021 |
| CHRX        | GM25953     | Normal | 3   | 0.963 | 0.030 | 0.018 |
| CHRX        | GM25975     | Normal | 3   | 0.931 | 0.019 | 0.011 |
| CHRX        | GM25974     | Normal | 3   | 0.975 | 0.007 | 0.004 |
| CHRX        | GM25952     | Normal | 3   | 0.985 | 0.069 | 0.040 |
| CHRX        | Normal      | Normal | 3   | 1.000 | 0.027 | 0.016 |

**Table S7: Statistical results for the absolute quantification found in file ANOVA\_results.csv.** Target Name indicates the genes compared, DF: degrees of freedom, F is the statistic to determine the p-value, MS: mean squares, SS: sums of squares, measure indicates if the tests were dependent measures for example, in a time course, where cell lines were matched across samples. Dist indicates the distribution is normal (parametric).

| Target Name | DF | F       | MS     | SS      | p-value | p-value corrected | Measure   | Dist       |
|-------------|----|---------|--------|---------|---------|-------------------|-----------|------------|
| GAPDH       | 3  | 5.491   | 0.046  | 0.137   | 0.00951 | 0.04753           | dependent | parametric |
| ACTB        | 3  | 6.958   | 0.038  | 0.115   | 0.00372 | 0.01859           | dependent | parametric |
| KCNJ6       | 3  | 22.923  | 20.729 | 62.188  | 0.00001 | 0.00004           | dependent | parametric |
| SYP         | 3  | 114.917 | 58.478 | 175.433 | 0.00000 | 0.00000           | dependent | parametric |
| GRIA1       | 3  | 11.24   | 10.081 | 30.243  | 0.0004  | 0.00201           | dependent | parametric |

**Table S8: Post-hoc results from the statistical analysis of the absolute quantification from the one-way ANOVA.** These results are found in file Posthoc\_result.csv. The comparisons between individual stages for each gene is show. Target Name indicates the gene of interest. **A and B** show the two groups being compared. DF: degrees of freedom, p-value correct is the value corrected for multiple comparisons, p-value before correction for a paired t-test. Parametric, True means a normal distribution was selected.

| Target Name | A    | B    | DF | p-value corrected | p-value | Paired | Parametric |
|-------------|------|------|----|-------------------|---------|--------|------------|
| KCNJ6       | IPSC | NPC  | 5  | 0.85667           | 0.73431 | TRUE   | TRUE       |
| KCNJ6       | IPSC | DA4W | 5  | 0.00845           | 0.00282 | TRUE   | TRUE       |
| KCNJ6       | IPSC | DA6W | 5  | 0.00845           | 0.00253 | TRUE   | TRUE       |
| KCNJ6       | NPC  | DA4W | 5  | 0.01157           | 0.00705 | TRUE   | TRUE       |
| KCNJ6       | NPC  | DA6W | 5  | 0.01157           | 0.00771 | TRUE   | TRUE       |
| KCNJ6       | DA4W | DA6W | 5  | 0.85667           | 0.85667 | TRUE   | TRUE       |
| SYP         | IPSC | NPC  | 5  | 0.18543           | 0.171   | TRUE   | TRUE       |
| SYP         | IPSC | DA4W | 5  | 0.0001            | 0.00002 | TRUE   | TRUE       |
| SYP         | IPSC | DA6W | 5  | 0.00018           | 0.00009 | TRUE   | TRUE       |
| SYP         | NPC  | DA4W | 5  | 0.00018           | 0.00012 | TRUE   | TRUE       |
| SYP         | NPC  | DA6W | 5  | 0.00018           | 0.00011 | TRUE   | TRUE       |
| SYP         | DA4W | DA6W | 5  | 0.18543           | 0.18543 | TRUE   | TRUE       |
| GRIA1       | IPSC | NPC  | 5  | 0.06779           | 0.05649 | TRUE   | TRUE       |
| GRIA1       | IPSC | DA4W | 5  | 0.03575           | 0.01192 | TRUE   | TRUE       |
| GRIA1       | IPSC | DA6W | 5  | 0.03575           | 0.01137 | TRUE   | TRUE       |
| GRIA1       | NPC  | DA4W | 5  | 0.06779           | 0.03449 | TRUE   | TRUE       |
| GRIA1       | NPC  | DA6W | 5  | 0.06779           | 0.0519  | TRUE   | TRUE       |
| GRIA1       | DA4W | DA6W | 5  | 0.35174           | 0.35174 | TRUE   | TRUE       |

**Table S9: Example of output from the relative delta-CT analysis from the file clean\_data.csv showing the top 10 rows of data.** Target Name indicates the gene analyzed, Sample Name indicates the cell line, rq is the relative quantification for each replicate, rq-mean is the mean value of the replicates, rqSD is the standard deviation of the replicates, rqSEM is the standard error of the replicates, Outliers indicates if each outlier is a replicate, Group indicates the group used for statistics for the summary data.

| Target Name | Sample Name | rq     | rqMean | rqSD   | rqSEM  | Outliers | Group |
|-------------|-------------|--------|--------|--------|--------|----------|-------|
| PAX6        | AIW002-2    | 0.0187 | 0.0223 | 0.0032 | 0.0018 | FALSE    | D0    |
| PAX6        | AIW002-2    | 0.0248 | 0.0223 | 0.0032 | 0.0018 | FALSE    | D0    |
| PAX6        | AIW002-2    | 0.0235 | 0.0223 | 0.0032 | 0.0018 | FALSE    | D0    |
| PAX6        | AIW002-2    | 0.0072 | 0.0073 | 0.0004 | 0.0002 | FALSE    | D7    |
| PAX6        | AIW002-2    | 0.0069 | 0.0073 | 0.0004 | 0.0002 | FALSE    | D7    |
| PAX6        | AIW002-2    | 0.0077 | 0.0073 | 0.0004 | 0.0002 | FALSE    | D7    |
| PAX6        | KYOU        | 0.1261 | 0.1193 | 0.0065 | 0.0038 | FALSE    | D0    |
| PAX6        | KYOU        | 0.1131 | 0.1193 | 0.0065 | 0.0038 | FALSE    | D0    |
| PAX6        | KYOU        | 0.1187 | 0.1193 | 0.0065 | 0.0038 | FALSE    | D0    |
| PAX6        | KYOU        | 0.0202 | 0.0210 | 0.0007 | 0.0004 | FALSE    | D7    |

**Table S10: Statistical results from the relative quantification comparing the delta-CT and delta-delta-CT using student t-tests.** Target Name indicates the gene being compared, DF: degrees of freedom, tail; two tail t-test, paired FALSE indicated an unpaired t-test. Model indicates if the delta-CT or the delta-delta-CT method was used. Effect size is the difference between the means divided by the SD. Power is the probability of a type I error minus the probability of a type II error. The Bayes factors is ration between the probability of the null hypothesis and the alternative hypothesis being true. Values < 1 support the null hypothesis and values > 1 support the alternative hypothesis. The values seen here are only considered trends, a Bayes factor between 3-10 is considered moderate, 10-100 strong, >100 extreme support for the alternative hypothesis.

| Target Name | DF | T      | tail      | paired | p-value | model          | effect size | power | Bayes factor |
|-------------|----|--------|-----------|--------|---------|----------------|-------------|-------|--------------|
| PAX6        | 1  | 1.361  | two-sided | FALSE  | 0.40342 | delta CT       | 1.449       | 0.129 | 0.847        |
| CAMK2A      | 1  | -3.277 | two-sided | FALSE  | 0.18855 | delta CT       | 1.405       | 0.125 | 1.359        |
| GRIN1       | 1  | -3.744 | two-sided | FALSE  | 0.16616 | delta CT       | 1.836       | 0.162 | 1.454        |
| PAX6        | 1  | 1.361  | two-sided | FALSE  | 0.40342 | delta delta CT | 1.449       | 0.129 | 0.847        |
| CAMK2A      | 1  | -3.277 | two-sided | FALSE  | 0.18855 | delta delta CT | 1.405       | 0.125 | 1.359        |
| GRIN1       | 1  | -3.744 | two-sided | FALSE  | 0.16616 | delta delta CT | 1.836       | 0.162 | 1.454        |

**Table S11: Manual processing compared to Auto-qPCR processing with a range of cut-off values for std to exclude replicates, with or without preserving highly variable outliers.** Calculations are all using the absolute model to quantify NRXN3 expression with and without cocaine treatment in three brain regions. Values that differ across processing conditions are highlighted in bold. **Left**, the sample information for Region, Treatment and code name of each mouse (biological replicate) are listed. The processing methods, Manual or Auto-qPCR, are labelled. The CT-SD cut-off is the value for which std exceeded for outliers to be moved. The settings for preserving highly variable technical if the ration of mean-media/media is less than 0.1 is indicated by 'yes'. RNA indicates the RNA quantification values.





**Table S12: Comparison of variance between manual processing and Auto-qPCR.** The variance between RNA quantity values calculated manually or with Auto-qPCR were calculated between each mean value found in table S11. For each brain region the sum of the variance was calculated. The same comparison was performed between manual processing and Auto-qPCR with the standard cut-off of 0.3 and the standard cut-off together plus the preserve extreme values option.

| <b>Region</b> | <b>Cut-off 0.3</b> | <b>Cut-off 0.3 +<br/>Preserve</b> |
|---------------|--------------------|-----------------------------------|
| STN           | 0.004              | 0.003                             |
| GP            | 0.000              | 0.000                             |
| SN            | 0.037              | 0.030                             |
| All regions   | 0.037              | 0.033                             |

**Table S13: Addition of group columns used for statistical analysis for one-way and two-way ANOVAs.** Treatment (Control, Cocaine), Region (STN,GP,SN) and both together, T\_R (STN\_Control, STN\_Cocaine, GP\_Control, GP\_Cocaine, SN\_Control, SN\_Cocaine). Each group column was used for separate one-way ANOVAs. The 'Treatment' and 'Region' column were used in the two way ANOVA. For visualization the first 15 rows with sample data are shown from the full spreadsheet.

| Well /set | Dye | Content | Description | Efficiency | C(t)  | ng    | T_R         | Treatment | Region |
|-----------|-----|---------|-------------|------------|-------|-------|-------------|-----------|--------|
| B1        | FAM | Sample  | B4bisNST    | 50.57%     | 30.71 | 0.128 | STN_Control | Control   | STN    |
| B1        | TMR | Sample  | B4bisNST    | N/A        | N/A   |       | STN_Control | Control   | STN    |
| B2        | FAM | Sample  | B4bisNST    | 45.00%     | 30.29 | 0.170 | STN_Control | Control   | STN    |
| B2        | TMR | Sample  | B4bisNST    | N/A        | N/A   |       | STN_Control | Control   | STN    |
| B3        | FAM | Sample  | B4bisNST    | 46.18%     | 30.2  | 0.181 | STN_Control | Control   | STN    |
| B3        | TMR | Sample  | B4bisNST    | N/A        | N/A   |       | STN_Control | Control   | STN    |
| B4        | FAM | Sample  | B4bisGP     | 32.11%     | 26.6  | 2.053 | GP_Control  | Control   | GP     |
| B4        | TMR | Sample  | B4bisGP     | N/A        | N/A   |       | GP_Control  | Control   | GP     |
| B5        | FAM | Sample  | B4bisGP     | 45.30%     | 28.43 | 0.598 | GP_Control  | Control   | GP     |
| B5        | TMR | Sample  | B4bisGP     | N/A        | N/A   |       | GP_Control  | Control   | GP     |
| B6        | FAM | Sample  | B4bisGP     | 47.44%     | 28.18 | 0.708 | GP_Control  | Control   | GP     |
| B6        | TMR | Sample  | B4bisGP     | N/A        | N/A   |       | GP_Control  | Control   | GP     |
| B7        | FAM | Sample  | B4bisSN     | 47.60%     | 27.56 | 1.073 | SN_Control  | Control   | SN     |
| B7        | TMR | Sample  | B4bisSN     | N/A        | N/A   |       | SN_Control  | Control   | SN     |

**Table S14: Results of the statistical analysis of control vs. cocaine treatment for all brain regions.** The results of an unpaired, two tailed students t-test performed in Auto-qPCR using the statistic selections. The table is found in the file 'ttest\_results.csv'.

| Target Name  | DF    | T      | tail      | paired | p-val |
|--------------|-------|--------|-----------|--------|-------|
| <i>B2M</i>   | 18.54 | 0      | two-sided | FALSE  | 1.000 |
| <i>NRXN3</i> | 22.74 | -1.555 | two-sided | FALSE  | 0.134 |

**Table S15: Posthoc results after one-way ANOVA comparing brain regions. Control and cocaine treatment samples were pooled together.** Target name indicates the gene tested. **A and B** indicate the two regions being compared. DF: degree of freedom.

| Target Name | A   | B  | DF | p-value corrected | p-value | correction method |
|-------------|-----|----|----|-------------------|---------|-------------------|
| B2M         | STN | GP | 9  | 1.0000            | 1.0000  | fdr_bh            |
| B2M         | STN | SN | 12 | 1.0000            | 1.0000  | fdr_bh            |
| B2M         | GP  | SN | 16 | 1.0000            | 1.0000  | fdr_bh            |
| NRXN3       | STN | GP | 9  | 0.0071            | 0.0047  | fdr_bh            |
| NRXN3       | STN | SN | 8  | 0.0048            | 0.0016  | fdr_bh            |
| NRXN3       | GP  | SN | 16 | 0.0549            | 0.0549  | fdr_bh            |

**Table S16: One-way ANOVA and posthoc test comparing groups of brain region and treatment.** The ANOVA results are shown for both B2M and NRXN3 for the overall effect of treatment and brain region together (One-way ANOVA). The post-hoc tests for the relevant comparisons are shown for each brain region with and without cocaine treatment (post-hoc).

| Target Name | Comparison                 | DF | p-value corrected | p-value | Test          |
|-------------|----------------------------|----|-------------------|---------|---------------|
| B2M         | Treatment and region       | 5  | 0.3885            | 0.7771  | One-way ANOVA |
| NRXN3       | Treatment and region       | 5  | 0.0006            | 0.0011  | One-way ANOVA |
| NRXN3       | STN_Control vs STN_Cocaine | 8  | 0.9977            | 0.9977  | post-hoc      |
| NRXN3       | GP_Control vs GP_Cocaine   | 7  | 0.0176            | 0.0334  | post-hoc      |
| NRXN3       | SN_Control vs SN_Cocaine   | 5  | 0.4127            | 0.4762  | post-hoc      |

**Table S17: Two-way ANOVA and posthoc tests comparing brain region, treatment and interaction. The relevant information was selected from the output files 'ANOVA\_results.csv' and 'Posthoc\_results.csv'. The 2-way ANOVA results are shown for NRXN3 for the overall effect of brain region (Group1), treatment (Group2) and the interaction effect of region and treatment (Group1\*Group2) (upper table). The post-hoc tests for the relevant comparisons are shown for each brain region with and without cocaine treatment for each brain region indicated under contrast. The 2-way ANOVA results are shown on top and the post-hoc multiple t-test comparisons are shown on the bottom, indicated in the Test column**

| <b>Target Name</b> | <b>Contrast</b>         | <b>DF</b> | <b>p-value corrected</b> | <b>p-value</b> | <b>Test</b> |
|--------------------|-------------------------|-----------|--------------------------|----------------|-------------|
| NRXN3              | Group1: Region          | 2         | 0.0004                   | 0.0001         | ANOVA       |
| NRXN3              | Group2: Treatment       | 1         | 0.2265                   | 0.0755         | ANOVA       |
| NRXN3              | Group1 * Group2         | 2         | 1.0000                   | 0.3513         | ANOVA       |
| NRXN3              | all: Control vs Cocaine | 23        | NA                       | 0.1337         | post-hoc    |
| NRXN3              | STN: Control vs Cocaine | 8         | 0.9977                   | 0.9977         | post-hoc    |
| NRXN3              | GP: Control vs Cocaine  | 7         | 0.0529                   | 0.0176         | post-hoc    |
| NRXN3              | SN: Control vs Cocaine  | 5         | 0.6190                   | 0.4127         | post-hoc    |

**Table S18: Comparison of Auto-qPCR with similar open-source analysis programs.**

| Feature                                             | Auto-q-PCR    | SATQPCR <sup>1</sup> | PIPE-T <sup>2</sup> | Q-PCR <sup>3</sup> | Do my qPCR calculation <sup>4</sup> |
|-----------------------------------------------------|---------------|----------------------|---------------------|--------------------|-------------------------------------|
| Input type                                          | CQ            | CQ                   | rawCt.Cq Values     | raw                | CQ                                  |
| Paste input into web                                | no            | no                   | no                  | no                 | yes                                 |
| Upload files                                        | txt, csv, xml | txt                  | txt                 | RDML, csv          | tsv, xls, ods                       |
| Files can be uploaded without reformatting          | yes           | no                   | yes                 | yes                | no                                  |
| CQ calculation                                      | no            | no                   | no                  | yes                | no                                  |
| Normalization and RQ<br>Absolute model              | yes           | no                   | no                  | no                 | no                                  |
| Normalization and RQ<br>Relative dCT model          | yes           | yes                  | yes                 | yes                | no                                  |
| Normalization and RQ<br>Relative ddCT model         | yes           | yes                  | yes                 | yes                | yes                                 |
| User selections for removal of technical replicates | yes           | no                   | yes                 | yes                | no                                  |
| Can account for PCR efficiency                      | no            | yes                  | no                  | yes                | yes                                 |
| Allows multiple genes for normalization             | yes           | yes                  | yes                 | yes                | yes                                 |

|                                 |                |                                 |                                                    |                                              |        |
|---------------------------------|----------------|---------------------------------|----------------------------------------------------|----------------------------------------------|--------|
| Output summary values           | csv            | txt                             | txt                                                | xls, csv                                     | xlsx   |
| Output all technical replicates | csv            | txt                             | txt                                                | no                                           | xlsx   |
| Output graphs                   | png            | jpg                             | png                                                | svg, png                                     | xlsx   |
| statistics                      | Multiple tests | T-test or Anova with Tukey test | T-test<br>Two sample Wilcoxon test<br>Rank product | Anova, t-test, permutation test              | t-test |
| Web based                       | Yes            | Yes                             | No                                                 | Yes                                          | yes    |
| Requires login                  | No             | No                              | No                                                 | Yes                                          | no     |
| Release date                    | 2021           | 2019                            | 2019                                               | Original publication:<br>2009<br>2013 update | 2019   |
| Reference                       | This paper     | 1                               | 2                                                  | 3                                            | 4      |

#### References:

- 1 Rancurel, C., van Tran, T., Elie, C. & Hilliou, F. SATQPCR: Website for statistical analysis of real-time quantitative PCR data. *Mol Cell Probes* **46**, 101418, doi:10.1016/j.mcp.2019.07.001 (2019).
- 2 Zanardi, N. *et al.* PIPE-T: a new Galaxy tool for the analysis of RT-qPCR expression data. *Sci Rep* **9**, 17550, doi:10.1038/s41598-019-53155-9 (2019).
- 3 Pabinger, S. *et al.* QPCR: Application for real-time PCR data management and analysis. *BMC Bioinformatics* **10**, 268, doi:10.1186/1471-2105-10-268 (2009).
- 4 Tournayre, J., Reichstadt, M., Parry, L., Fafournoux, P. & Jousse, C. "Do my qPCR calculation", a web tool. *Bioinformatics* **15**, 369-372, doi:10.6026/97320630015369 (2019).

**File S1: Required packages and versions used for running Auto-qPCR.** These packages are found in the document 'requirements.txt' and are installed in the virtual environment using python3 and pip.

```
blinker==1.4
certifi==2021.5.30
chardet==4.0.0
click==8.0.1
cyclcr==0.10.0
Flask==2.0.1
Flask-Mail==0.9.1
idna==3.2
itsdangerous==2.0.1
Jinja2==3.0.1
joblib==1.0.1
kiwisolver==1.3.1
littleutils==0.2.2
MarkupSafe==2.0.1
matplotlib==3.3.4
numpy==1.19.5
outdated==0.2.1
pandas==1.1.5
pandas-flavor==0.2.0
patsy==0.5.1
Pillow==8.3.2
pingouin==0.3.7
pyparsing==2.4.7
python-dateutil==2.8.2
pytz==2021.1
requests==2.26.0
six==1.16.0
statsmodels==0.12.2
tabulate==0.8.9
threadpoolctl==2.2.0
urllib3==1.26.6
Werkzeug==2.0.1
xarray==0.16.2
```
